# Supplementary material for: A Double-Blind, Randomized Placebo-Controlled Trial of Probiotic Lactobacillus casei Shirota in Stable Cirrhotic Patients
Source: MDPI journal article supplement (doi:10.3390/nu12061651), 2020-06-02
Supplement: s1 [file s1]

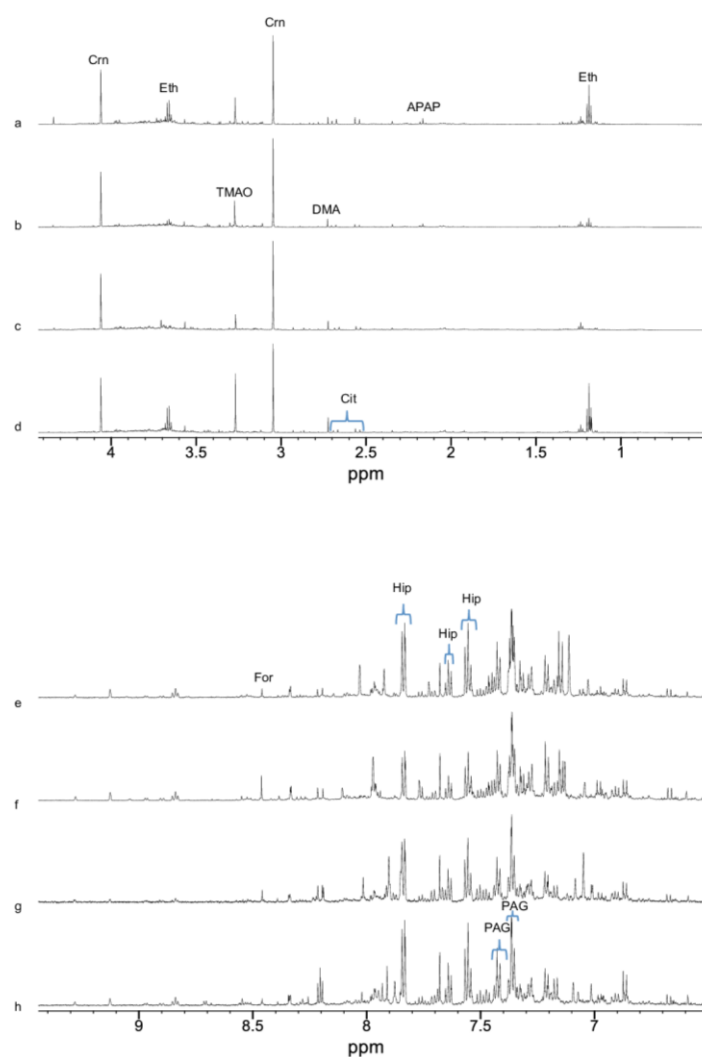

**Figure S1.** Illustrative urinary proton NMR spectra from: a male with alcoholic cirrhosis, Child Pugh A, MELD 9 (a,e) at day 0 and (b,f) six month after placebo supplementation; and male with alcoholic cirrhosis, Child Pugh A, MELD 12 (c,g) at baseline and (d,h) six month after LcS supplementation. Each NMR spectrum is scaled independently and (a-d) shows the aliphatic region 0.5-4.5 ppm and (e-h) displays the aromatic region 6.5-9.5 ppm.

**Table S1.** Laboratory parameters in placebo and LcS-treated patient populations.

| Laboratory Parameter                  |         | Placebo (Median(IQR))   | LcS (Median(IQR))       | p value |
|---------------------------------------|---------|-------------------------|-------------------------|---------|
| Haemoglobin (g/dL)                    | Day 0   | 14.30 (13.00- 15.10)    | 13.60 (12.40- 14.70)    | 0.16    |
|                                       | Month 1 | 14.30 (13.30- 15.10)    | 13.55 (12.15- 14.55)    | 0.08    |
|                                       | Month 6 | 14.20 (13.00- 15.00)    | 13.45 (12.20- 15.10)    | 0.36    |
| Leucocyte Count (10 <sup>9</sup> /L)  | Day 0   | 5.80 (4.72- 7.37)       | 5.88 (4.70- 7.30)       | 0.88    |
|                                       | Month 1 | 5.60 (4.52- 6.70)       | 6.05 (4.56- 6.91)       | 0.77    |
|                                       | Month 6 | 5.40 (4.43- 6.61)       | 6.48 (4.70- 7.43)       | 0.35    |
| Neutrophil Count (10 <sup>9</sup> /L) | Day 0   | 3.43 (2.49- 4.46)       | 3.32 (2.35- 4.14)       | 0.42    |
|                                       | Month 1 | 3.08 (2.42- 4.07)       | 3.22 (2.39- 3.86)       | 0.85    |
|                                       | Month 6 | 3.14 (2.53- 4.07)       | 3.52 (2.26- 4.44)       | 0.56    |
| Lymphocyte Count (10 <sup>9</sup> /L) | Day 0   | 1.48 (0.98- 2.21)       | 1.90 (1.23- 2.36)       | 0.15    |
|                                       | Month 1 | 1.61 (1.07- 2.38)       | 1.89 (1.34- 2.47)       | 0.39    |
|                                       | Month 6 | 1.63 (0.99- 2.14)       | 1.90 (1.36- 2.37)       | 0.16    |
| MCV (fL)                              | Day 0   | 91.10 (88.30- 95.40)    | 88.75 (86.10- 94.40)    | 0.15    |
|                                       | Month 1 | 91.60 (88.00- 94.90)    | 88.75 (85.85- 93.85)    | 0.09    |
|                                       | Month 6 | 91.30 (87.30- 93.20)    | 87.50 (84.20- 90.00)    | 0.02    |
| Platelet Count (10 <sup>9</sup> /L)   | Day 0   | 125.00 (90.00- 170.00)  | 114.00 (84.00- 194.00)  | 0.76    |
|                                       | Month 1 | 116.00 (89.00- 169.00)  | 129.50 (79.50- 186.00)  | 0.81    |
|                                       | Month 6 | 132.00 (96.00- 155.00)  | 138.00 (77.00- 182.00)  | 0.76    |
| Sodium (mmol/L)                       | Day 0   | 141.00 (138.00- 143.00) | 140.00 (138.00- 142.00) | 0.23    |
|                                       | Month 1 | 141.00 (139.00- 143.00) | 140.00 (138.00- 142.00) | 0.26    |
|                                       | Month 6 | 139.00 (136.00- 141.00) | 139.50 (136.00- 141.00) | 0.74    |
| Potassium (mmol/L)                    | Day 0   | 4.10 (3.80- 4.30)       | 4.20 (4.00- 4.50)       | 0.07    |
|                                       | Month 1 | 4.10 (3.90- 4.40)       | 4.30 (4.10- 4.60)       | 0.01    |
|                                       | Month 6 | 4.10 (3.80- 4.50)       | 4.30 (4.10- 4.50)       | 0.07    |
| Urea (mmol/L)                         | Day 0   | 4.40 (3.60- 6.10)       | 4.00 (3.30- 5.50)       | 0.59    |
|                                       | Month 1 | 4.20 (3.30- 6.20)       | 4.30 (3.30- 5.80)       | 0.97    |
|                                       | Month 6 | 4.70 (3.60- 6.10)       | 4.40 (3.70- 5.80)       | 0.79    |
| Creatinine (umol/L)                   | Day 0   | 73.00 (64.00- 87.00)    | 75.00 (64.00- 86.00)    | 0.89    |
|                                       | Month 1 | 76.00 (63.00- 89.00)    | 75.00 (63.00- 90.00)    | 0.95    |
|                                       | Month 6 | 78.00 (65.00- 88.00)    | 78.50 (71.00- 89.00)    | 0.70    |
| Bilirubin (umol/L)                    | Day 0   | 16.00 (10.00- 25.00)    | 16.00 (10.00- 25.00)    | 0.54    |
|                                       | Month 1 | 14.00 (10.00- 21.00)    | 13.50 (10.00- 25.00)    | 0.73    |
|                                       | Month 6 | 15.00 (10.00- 25.00)    | 13.50 (10.00- 25.00)    | 0.66    |
| Albumin (g/L)                         | Day 0   | 41.00 (38.00- 45.00)    | 41.00 (37.50- 43.00)    | 0.29    |
|                                       | Month 1 | 43.00 (40.00- 45.00)    | 41.00 (38.00- 44.00)    | 0.10    |
|                                       | Month 6 | 42.00 (38.00- 45.00)    | 42.00 (39.00- 44.00)    | 0.87    |
| Alanine transaminase (IU/L)           | Day 0   | 30.00 (20.00- 40.00)    | 28.00 (23.00- 48.00)    | 0.67    |
|                                       | Month 1 | 32.00 (24.00- 43.00)    | 33.00 (23.00- 47.00)    | 0.90    |
|                                       | Month 6 | 28.00 (21.00- 51.00)    | 30.00 (21.00- 43.00)    | 0.99    |
| Aspartate Aminotransferase (IU/L)     | Day 0   | 38.00 (28.00- 57.00)    | 39.00 (31.00- 47.00)    | 0.98    |
|                                       | Month 1 | 41.00 (28.00- 71.00)    | 35.50 (30.00- 49.00)    | 0.36    |
|                                       | Month 6 | 36.00 (24.00- 54.00)    | 33.00 (27.00- 43.00)    | 0.73    |
| Alkaline Phosphatase (IU/L)           | Day 0   | 81.00 (61.00- 110.00)   | 104.00 (81.00- 127.00)  | 0.01    |
|                                       | Month 1 | 84.00 (61.00- 113.00)   | 98.00 (79.00- 129.00)   | 0.10    |
|                                       | Month 6 | 83.00 (59.00- 109.00)   | 99.50 (74.00- 119.00)   | 0.07    |
| γ-Glutamyl Transferase (IU/L)         | Day 0   | 56.00 (31.00- 181.00)   | 82.00 (50.50- 178.50)   | 0.13    |
|                                       | Month 1 | 65.00 (34.00- 205.00)   | 90.00 (44.00- 195.00)   | 0.47    |
|                                       | Month 6 | 63.50 (41.00- 163.00)   | 95.50 (42.00- 160.50)   | 0.64    |
| Amylase (U/L)                         | Day 0   | 78.50 (59.00- 97.00)    | 85.00 (56.50- 110.50)   | 0.45    |
|                                       | Month 1 | 77.50 (58.00- 94.50)    | 90.00 (64.00- 113.00)   | 0.09    |
|                                       | Month 6 | 75.50 (57.00- 89.00)    | 80.00 (55.00- 108.00)   | 0.43    |
| C-Reactive Protein (mg/L)             | Day 0   | 1.00 (0.50- 5.00)       | 2.00 (1.00- 6.00)       | 0.39    |
|                                       | Month 1 | 1.00 (0.50- 4.00)       | 1.00 (1.00- 5.00)       | 0.40    |
|                                       | Month 6 | 1.00 (1.00- 6.00)       | 2.00 (1.00- 4.00)       | 0.76    |

**Table S2. A** Quality of Life Assessment using the SF-36 questionnaire (total population).

| A. Scale                                   |         | Placebo (Mean[SD]) | LcS (Mean[SD]) | p value |
|--------------------------------------------|---------|--------------------|----------------|---------|
| Physical functioning                       | Day 0   | 67.66 (32.95)      | 58.43 (32.35)  | 0.25    |
|                                            | Month 1 | 75.17 (27.14)      | 63.00 (33.57)  | 0.13    |
|                                            | Month 6 | 68.83 (30.19)      | 65.86 (35.23)  | 0.73    |
| Role limitations due to physical health    | Day 0   | 60.71 (41.25)      | 53.91 (44.04)  | 0.52    |
|                                            | Month1  | 66.41 (41.93)      | 57.76 (46.34)  | 0.45    |
|                                            | Month 6 | 56.67 (45.93)      | 64.17 (41.88)  | 0.51    |
| Role limitations due to emotional problems | Day 0   | 64.81 (42.87)      | 64.65 (42.44)  | 0.99    |
|                                            | Month 1 | 70.83 (42.96)      | 69.61 (41.33)  | 0.91    |
|                                            | Month 6 | 65.59 (42.59)      | 72.92 (37.33)  | 0.47    |
| Energy/fatigue                             | Day 0   | 51.88 (27.29)      | 46.71 (24.34)  | 0.42    |
|                                            | Month 1 | 51.61 (25.21)      | 49.69 (24.16)  | 0.76    |
|                                            | Month 6 | 58.50 (22.40)      | 57.50 (20.96)  | 0.86    |
| Emotional well-being                       | Day 0   | 69.14 (23.48)      | 62.16 (23.01)  | 0.21    |
|                                            | Month 1 | 73.33 (21.06)      | 64.97 (24.58)  | 0.14    |
|                                            | Month 6 | 75.03 (23.70)      | 64.39 (21.55)  | 0.07    |
| Social functioning                         | Day 0   | 72.30 (31.06)      | 67.14 (29.56)  | 0.47    |
|                                            | Month 1 | 71.09 (27.02)      | 66.80 (32.32)  | 0.57    |
|                                            | Month 6 | 75.40 (31.04)      | 66.67 (31.20)  | 0.29    |
| Pain                                       | Day 0   | 66.94 (28.56)      | 69.49 (26.72)  | 0.69    |
|                                            | Month 1 | 74.14 (25.50)      | 64.63 (30.75)  | 0.18    |
|                                            | Month 6 | 68.17 (28.63)      | 68.05 (27.02)  | 0.99    |
| General health                             | Day 0   | 49.38 (25.26)      | 48.65 (22.81)  | 0.9     |
|                                            | Month 1 | 50.34 (25.77)      | 43.83 (23.91)  | 0.32    |
|                                            | Month 6 | 49.00 (26.95)      | 49.33 (24.56)  | 0.96    |

**Table S2. B** Quality of Life Assessment using the SF-36 questionnaire (alcoholic sub-population).

| B. Scale                                   |         | Placebo (Mean[SD]) | LcS (Mean[SD]) | p value |
|--------------------------------------------|---------|--------------------|----------------|---------|
| Physical functioning                       | Day 0   | 64.64 (37.65)      | 66.25 (32.27)  | 0.9     |
|                                            | Month 1 | 74.06 (31.05)      | 57.00 (39.59)  | 0.19    |
|                                            | Month 6 | 67.50 (35.31)      | 63.21 (39.84)  | 0.76    |
| Role limitations due to physical health    | Day 0   | 62.50 (41.83)      | 56.67 (43.78)  | 0.71    |
|                                            | Month 1 | 69.12 (40.05)      | 48.08 (48.37)  | 0.2     |
|                                            | Month 6 | 70.31 (43.99)      | 59.38 (41.71)  | 0.48    |
| Role limitations due to emotional problems | Day 0   | 68.63 (44.83)      | 77.78 (34.88)  | 0.53    |
|                                            | Month 1 | 74.51 (38.24)      | 62.50 (46.94)  | 0.43    |
|                                            | Month 6 | 75.00 (35.49)      | 72.92 (32.70)  | 0.86    |
| Energy/fatigue                             | Day 0   | 58.00 (28.77)      | 47.22 (24.45)  | 0.25    |
|                                            | Month 1 | 59.12 (26.82)      | 49.69 (26.42)  | 0.32    |
|                                            | Month 6 | 64.06 (24.24)      | 54.38 (23.44)  | 0.26    |
| Emotional well-being                       | Day 0   | 69.07 (26.90)      | 69.33 (19.26)  | 0.97    |
|                                            | Month 1 | 74.12 (22.68)      | 62.82 (21.90)  | 0.15    |
|                                            | Month 6 | 80.50 (21.51)      | 69.75 (17.03)  | 0.13    |
| Social functioning                         | Day 0   | 74.31 (32.79)      | 71.32 (27.16)  | 0.77    |
|                                            | Month 1 | 73.53 (26.84)      | 66.41 (34.07)  | 0.51    |
|                                            | Month 6 | 76.56 (30.91)      | 66.96 (32.00)  | 0.41    |
| Pain                                       | Day 0   | 64.84 (31.89)      | 68.95 (28.31)  | 0.69    |
|                                            | Month 1 | 73.68 (27.70)      | 66.72 (33.81)  | 0.52    |
|                                            | Month 6 | 73.44 (30.62)      | 65.78 (29.44)  | 0.48    |
| General health                             | Day 0   | 61.79 (23.58)      | 51.47 (21.56)  | 0.21    |
|                                            | Month 1 | 60.00 (25.63)      | 49.38 (24.42)  | 0.25    |
|                                            | Month 6 | 56.25 (29.75)      | 49.33 (21.78)  | 0.47    |

**Table S2. C** Quality of Life Assessment using the SF-36 questionnaire (non-alcoholic sub-population).

| C. Scale                                   |         | Placebo (Mean[SD]) | LcS (Mean[SD]) | p value |
|--------------------------------------------|---------|--------------------|----------------|---------|
| Physical functioning                       | Day 0   | 70.00 (29.70)      | 51.84 (31.76)  | 0.08    |
|                                            | Month 1 | 76.54 (22.58)      | 69.00 (26.27)  | 0.43    |
|                                            | Month 6 | 70.36 (24.30)      | 68.33 (31.55)  | 0.85    |
| Role limitations due to physical health    | Day 0   | 59.21 (41.84)      | 51.47 (45.48)  | 0.6     |
|                                            | Month 1 | 63.33 (45.18)      | 65.63 (44.60)  | 0.89    |
|                                            | Month 6 | 41.07 (44.51)      | 69.64 (42.94)  | 0.1     |
| Role limitations due to emotional problems | Day 0   | 61.40 (41.96)      | 53.70 (45.93)  | 0.6     |
|                                            | Month 1 | 66.67 (48.80)      | 75.93 (35.80)  | 0.53    |
|                                            | Month 6 | 55.56 (48.25)      | 72.92 (42.55)  | 0.3     |
| Energy/fatigue                             | Day 0   | 46.47 (25.54)      | 46.18 (24.97)  | 0.97    |
|                                            | Month 1 | 42.50 (20.45)      | 49.69 (22.54)  | 0.37    |
|                                            | Month 6 | 52.14 (18.99)      | 61.07 (17.89)  | 0.21    |
| Emotional well-being                       | Day 0   | 69.20 (21.29)      | 55.37 (24.67)  | 0.07    |
|                                            | Month 1 | 72.50 (19.91)      | 67.25 (27.68)  | 0.54    |
|                                            | Month 6 | 68.31 (25.38)      | 58.67 (24.83)  | 0.32    |
| Social functioning                         | Day 0   | 70.39 (30.11)      | 63.19 (31.93)  | 0.48    |
|                                            | Month 1 | 68.33 (27.90)      | 67.19 (31.58)  | 0.92    |
|                                            | Month 6 | 74.17 (32.21)      | 66.35 (31.62)  | 0.52    |
| Pain                                       | Day 0   | 68.63 (26.33)      | 70.00 (25.85)  | 0.87    |
|                                            | Month 1 | 74.67 (23.71)      | 62.78 (28.62)  | 0.21    |
|                                            | Month 6 | 62.14 (25.96)      | 70.31 (25.13)  | 0.39    |
| General health                             | Day 0   | 39.72 (22.65)      | 46.25 (24.11)  | 0.4     |
|                                            | Month 1 | 40.00 (22.36)      | 37.50 (22.51)  | 0.77    |
|                                            | Month 6 | 40.71 (21.47)      | 49.33 (27.83)  | 0.36    |

**Table S3. A** Number of abnormal neutrophil tests at baseline in placebo, LcS-treated and total patient groups.

|                     | Patients with Abnormal Baseline Neutrophil Function |     |       |
|---------------------|-----------------------------------------------------|-----|-------|
|                     | Placebo                                             | LcS | Total |
| PBS-induced ROS     | 15                                                  | 9   | 24    |
| E. coli-induced ROS | 12                                                  | 13  | 25    |
| fMLP-induced ROS    | 18                                                  | 16  | 34    |
| PMA-induced ROS     | 4                                                   | 7   | 11    |
| Phagocytosis        | 11                                                  | 9   | 20    |

**Table S3. B** Number of patients in placebo, LcS-treated and total patient groups with abnormal neutrophil PBS-, *E.coli*, fMLP, PMA-induced Reactive Oxidant Species (ROS) production and phagocytosis.

| Number of Abnormal Neutrophil Tests at Baseline | Placebo | LcS | Total |
|-------------------------------------------------|---------|-----|-------|
| 4                                               | 5       | 3   | 8     |
| 3                                               | 5       | 4   | 9     |
| 2                                               | 9       | 10  | 19    |
| 1                                               | 7       | 10  | 17    |

**Table S4.** Gastrointestinal Adverse Event Profile.

|                 | Diarrhoea |      | Constipation |      | Abdominal discomfort |      | Bloating |      | p value<br>(Placebo vs LcS) |
|-----------------|-----------|------|--------------|------|----------------------|------|----------|------|-----------------------------|
|                 | Placebo   | LcS  | Placebo      | LcS  | Placebo              | LcS  | Placebo  | LcS  |                             |
| Day 0-Day 14    | 2.38      | 6.82 | 2.38         | 2.27 | 11.9                 | 4.25 | 7.14     | 6.82 | >0.05                       |
| Day 14-Month 1  | 2.5       | 2.56 | 2.5          | 0    | 7.5                  | 7.69 | 2.5      | 2.56 | >0.05                       |
| Month 1-Month 3 | 0         | 5.56 | 3.23         | 0    | 0                    | 2.78 | 3.23     | 2.78 | >0.05                       |
| Month 3-Month 6 | 5.71      | 0    | 0            | 0    | 2.86                 | 6.45 | 2.86     | 0    | >0.05                       |

## Supplementary Methods

### *Analysis of neutrophil oxidative burst and phagocytosis*

Phagoburst and Phagotest (BD Biosciences) kits were used to analyse oxidative burst and phagocytosis of neutrophils, respectively. Neutrophils isolated by Polymorphprep™ (Alere) were corrected to a concentration of  $1 \times 10^7/\text{ml}$ , and treated either with healthy or patient plasma for 90 minutes. Neutrophils were further stimulated with PBS (untreated), unlabelled opsonized bacteria (*E.coli*), labelled opsonized bacteria, N-formyl-Met-Leu-Phe (fMLP) and phorbol 12-myristate 13-acetate (PMA) for 20 minutes before analysis by flow cytometry using BD LSRFortessa™ (BD Biosciences). Data from flow cytometry was analysed using FlowJo® 9.9.6 (BD). Neutrophil geometric mean fluorescent intensities (GMFI) were calculated from FSC/SSC high granulocyte populations expressing CD16 and CD11b.
